# 1 **Conditional Survival and Nomogram for Elderly** 2 **Non-Metastatic Colon Cancer Patients Following Colectomy**

3 Yadong Gao<sup>1,6</sup>, Huimin Wang<sup>2\*</sup>, Yi Zhang<sup>3</sup>, Jing Zhao<sup>4</sup>, Sujuan Feng<sup>5\*</sup>,  
4 Jianwei Qiu<sup>1\*</sup>

5 1. Department of Gastroenterology, Affiliated Hospital 2 of Nantong University,  
6 Nantong, China

7 2. Department of Cardiology, Affiliated Hospital 2 of Nantong University, Nantong,  
8 China

9 3. Department of Neurosurgery, Affiliated Hospital 2 of Nantong University,  
10 Nantong, China

11 4. Department of Dermatology, Affiliated Nantong Hospital 3 of Nantong University

12 5. Department of Nephrology, Affiliated Hospital 2 of Nantong University, Nantong,  
13 China

14 6. Nantong Clinical Medical College of Kangda College, Nanjing Medical  
15 University, Nantong, China

## 16 **\* Correspondence:**

17 Dr Jianwei Qiu, Department of Gastroenterology, Affiliated Hospital 2 of Nantong  
18 University, 666 Shengli Road, Chongchuan District, Nantong 226001, China. E-mail:  
19 [ntfhqjw@163.com](mailto:ntfhqjw@163.com)

20 Dr Huimin Wang, Department of Cardiology, Affiliated Hospital 2 of Nantong  
21 University, 666 Shengli Road, Chongchuan District, Nantong 226001, China. E-mail:  
22 [wanghuimin1112@yeah.net](mailto:wanghuimin1112@yeah.net)

23 Dr Sujuan Feng, Department of Nephrology, Affiliated Hospital 2 of Nantong  
24 University, 666 Shengli Road, Chongchuan District, Nantong 226001, China. E-mail:  
25 [takeucifsj@163.com](mailto:takeucifsj@163.com)

26 **Keywords:** Conditional Survival; Colon Cancer; Colectomy; Nomogram; SEER

## 27 **Ethical approval**

28 The information used in our study was obtained from the SEER database,  
29 which is accessible to the public, thus eliminating the need for ethical  
30 clearance.

## 31 **Sources of funding**

32 This work was supported by the Project of Chinese Medicine

33 **Administration of Jiangsu Provincial Health Commission (MS2021066),**  
NOTE: This preprint reports new research that has not been certified by peer review and should not be used to guide clinical practice.

34 Nantong Science and Technology Bureau project (MS2022021), Nantong  
35 University Clinical Basic Research Special General Project (2022JY003),  
36 the Research project of Nantong Clinical Medical College of Kangda  
37 College of Nanjing Medical University (KD2022KYCXTD006,  
38 KD2022KYJJZD026), Open Fund for National Key Laboratory of Tumor  
39 System Medicine (KF2203-93), and Nantong City Health Commission  
40 Research Project (MSZ2022010, MS2023073).

#### 41 **Acknowledgments**

42 The invaluable support of ChatGPT was instrumental in enhancing the  
43 sentence structure revisions.

#### 44 **Conflict of Interest declaration**

45 The authors declare that they have no affiliations with or involvement in  
46 any organization or entity with any financial interest in the subject matter  
47 or materials discussed in this manuscript.

48

49

50

51

52

53

54

55

## 56 **Abstract**

57 **Background:** This study aimed to evaluate the conditional survival (CS)  
58 of elderly patients with non-metastatic colon cancer who underwent  
59 colectomy and build conditional nomograms that can accommodate  
60 varying survival periods and estimate survival rates.

61 **Methods:** Data from 9302 patients between 2004 and 2017 were obtained  
62 from the Surveillance, Epidemiology, and End Results database. CS was  
63 used to assess overall survival and colon-specific survival rates in patients  
64 who survived beyond a certain time period. Cox regression was used to  
65 select factors for nomogram development, and performance was  
66 evaluated using area under the receiver operating characteristic curve  
67 (AUC), calibration plot, and decision curve analysis (DCA).

68 **Results:** The 5-year conditional overall survival rates initially increased  
69 slightly but then decreased over time. The rates at different time points  
70 after diagnosis (baseline and 1-5 years) were 62.5, 63.2, 62.8, 62.1, 61.6,  
71 and 59.8%. In contrast, 5-year conditional colon-specific survival rates  
72 consistently improved over the same period. These rates were 78.1, 80.9,  
73 84.2, 86.9, 89.3, and 90.9%, respectively. Nomograms were developed  
74 for baseline measurements and for patients who survived 1, 3, and 5 years.  
75 The performance of these nomograms, assessed using AUC, calibration  
76 curves, and DCA, indicated good predictive capabilities.

77 **Conclusion:** CS provides valuable information on the medium- and

78 long-term survival probabilities of elderly patients with non-metastatic  
79 colon cancer who underwent colectomy. The developed conditional  
80 nomograms allowed for the estimation of survival probabilities across  
81 different timeframes, facilitating a comprehensive understanding of  
82 prognosis and collaborative decision making.

83

## 84 **1. Introduction**

85 Colon cancer is the third most common and deadly form of cancer  
86 worldwide, accounting for 10% of all cancer cases<sup>1</sup>. It mainly affects the  
87 elderly population, with most patients aged > 60 years and a significant  
88 number aged > 75<sup>2</sup>. As the global population ages, a significant increase  
89 in the prevalence of colon cancer is expected among older individuals. In  
90 the United States alone, the elderly population (65 years and older) is  
91 expected to increase by 20% by 2030, leading to a parallel surge in colon  
92 cancer cases<sup>3</sup>. Additionally, the number of adults aged  $\geq 85$  years is  
93 expected to triple to 19 million by 2060, further contributing to the rise in  
94 colon cancer cases. While there is no standardized definition of "elderly"  
95 in relation to colon cancer, it generally includes individuals aged 65-75 or  
96 older<sup>4-6</sup>.

97 Surgery is the preferred treatment for stage I–III colon cancer. Advances  
98 in medical standards have made radical surgery more feasible in elderly  
99 patients. Studies have shown an increase in the rate of radical surgery

100 among colon cancer patients aged  $\geq 75$  years who were diagnosed with  
101 stage I or II<sup>7</sup>. Surgical resection has been found to improve the prognosis  
102 of elderly colon cancer<sup>8-9</sup>. Improved perioperative management and  
103 comprehensive geriatric assessments have contributed to better tolerance  
104 to surgical treatment and improved quality of life in the elderly<sup>10</sup>. These  
105 factors have led to prolonged survival of elderly patients undergoing  
106 surgery.

107 Conditional survival (CS) is a statistical measure that estimates the  
108 likelihood of survival for a specific duration after diagnosis or treatment,  
109 considering the patient's current survival time<sup>11</sup>. This approach provides a  
110 more personalized prognosis that evolves over time, making it more  
111 relevant and meaningful to patients than the traditional survival analysis.  
112 It allows physicians to tailor checkup schedules and content based on a  
113 patient's unique survival pattern, enabling personalized adjustments.  
114 Previous studies on conditional survival in colorectal cancer have been  
115 conducted<sup>12-14</sup>, but most have included a diverse age range, and few have  
116 focused exclusively on the older population. A nomogram, which is a  
117 predictive tool for prognosis, has emerged as valuable in assessing the  
118 chances of survival in elderly colon cancer patients<sup>15</sup>. However, the  
119 nomogram overlooks the crucial aspect of incorporating patient survival  
120 duration. This study aimed to investigate conditional survival rates in  
121 elderly non-metastatic colon cancer patients who underwent colectomy,

122 while developing nomograms to assess their prognosis.

123

## 124 **2. Materials and methods**

### 125 **Data collection**

126 This study used data from the November 2020 release of the Surveillance,  
127 Epidemiology, and End Results (SEER) database obtained specifically  
128 from SEER\*Stat Version 8.4.2. The study adhered to the guidelines of the  
129 1964 Declaration of Helsinki and was conducted according to the  
130 STROCSS criteria. As per our institute's Ethics Committee, this study did  
131 not require approval from an institutional review board because it used  
132 de-identified public database information. The study included a subset of  
133 elderly colon cancer patients who underwent colectomy and met the  
134 following criteria: (1) aged 70–89 years, (2) pathologically diagnosed  
135 with stage I-III colon cancer, (3) had undergone colectomy, and (4) had  
136 colon cancer as the only primary cancer. Patients who received  
137 neoadjuvant therapy were excluded from the analysis because of their  
138 potential effects on downstaging and prognostic factors. Patients without  
139 clinicopathological data or survival information were excluded from this  
140 study. A diagram outlining the screening process is presented in  
141 Supplementary Figure 1.

### 142 **Statistical analyses**

143 In this study, the time from diagnosis to death from any cause was

144 referred to as overall survival (OS), while the time from diagnosis to  
145 death, specifically from colon cancer, was referred to as colon-specific  
146 survival (CSS). A multivariate Cox regression model was constructed to  
147 assess the correlation between clinicopathological characteristics and  
148 survival outcomes. Survival curves were generated using the  
149 Kaplan-Meier method, and survival disparities were assessed using the  
150 log-rank test. CS represents the likelihood of survival for an additional  
151 specified time period (y years) after survival for a certain duration (x  
152 years). This measure was derived from Kaplan-Meier survival data and  
153 was mathematically expressed as  $CS(x|y) = S(x+y)/S(x)$ , where  $S(x)$   
154 represents the OS or CSS rate at x years, as estimated the Kaplan-Meier  
155 method<sup>16</sup>. This study employed COS (x) and CCSS (x) as alternatives to  
156  $S(x)$  to determine the number of survivors in year x. The standardized  
157 differences (d) method was used to compute variations in CS across the  
158 subgroups<sup>17</sup>. When |d| was less than 0.1, it indicated negligible difference  
159 within each group; when it ranged from 0.1 to less than 0.3, it signified a  
160 minor difference; when it fell between 0.3 and less than 0.5, it  
161 suggested a moderate difference; and when |d| was 0.5 or greater, it  
162 indicated a notable difference.

163 The study participants were randomly allocated to either the training or  
164 validation cohort with a distribution ratio of 7:3. Univariate Cox  
165 regression analysis was performed to identify potential variables for

166 inclusion in multivariate analysis, with a requirement for significance of  
167  $p < 0.05$ . Subsequently, variables demonstrating prognostic significance in  
168 multivariate Cox regression analysis were used to construct nomograms.  
169 To evaluate the discriminative ability of the nomogram, the area under the  
170 receiver operating characteristic (ROC) curve (AUC) was calculated. The  
171 calibration assessment was conducted using the Brier score and a  
172 calibration plot, employing the bootstrapping approach with 1000  
173 resampling bootstraps. After the nomogram was subjected to decision  
174 curve analysis (DCA), its clinical efficacy was assessed.  
175 R version 4.1.1 was employed for statistical analysis. Categorical  
176 variables are presented as frequencies and percentages, and disparities  
177 among various groups were examined using the chi-squared test.  
178 Continuous variables were expressed as means with standard deviations  
179 and compared using the t-test or rank-sum test based on data distribution.  
180 Statistical significance was determined using a p-value less than 0.05.

181

### 182 **3. Results**

#### 183 **Clinicopathological characteristics**

184 This study encompassed 9302 cases from 2004 to 2017 based on specific  
185 criteria. As shown in Table 1, the training set consisted of 6511 patients,  
186 whereas the validation set comprised 2791 patients. The patients had an  
187 average age of 78.6 years with a standard deviation of 5.42. The majority



188 of these patients were female (57.4%), white (81.0%), diagnosed after  
189 2010 (55.2%), and had tumors located in the proximal colon (73.1%).  
190 Grade II patients constituted the largest proportion (70.2%), followed by  
191 grade III (19.7%), grade I (6.64%), and grade IV (3.48%) patients. Colon  
192 adenocarcinoma was the most common cancer type (89.7%). Tumors < 5  
193 cm accounted for 58.0% of the cases, and the majority of patients were  
194 married (51.6%) and had negative or normal carcino-embryonic antigen  
195 (CEA) test results (62.6%). Tumor stages were classified as T1 (7.99%),  
196 T2 (16.7%), T3 (61.2%), and T4 (14.1%). Nodal stages were classified as  
197 N0 (63.4%), N1 (24.6%), and N2 (12.0%). A small proportion of the  
198 patients received radiotherapy (0.8%) or chemotherapy (22.5%). The  
199 training and validation cohorts exhibited no significant differences in any  
200 of the variables.

## 201 **COS and CCSS**

202 Figure 1 shows the conditional survival curves. The analysis  
203 demonstrated a consistent pattern of improvement in the actuarial OS and  
204 CSS of individuals as the duration of survival increased annually.  
205 Meanwhile, as shown in Table 2 and Figure 1, the COS5 rates initially  
206 saw a marginal uptick, followed by a subsequent decline. Specifically, the  
207 rates at baseline, one year, two years, three years, four years, and five  
208 years post-diagnosis were 62.5%, 63.2%, 62.8%, 62.1%, 61.6%, and  
209 59.8%, respectively. However, the CCSS5 rates exhibited an upward

210 trajectory over the five-year period, with the initial and subsequent  
211 conditional survival rates at baseline and years 1 through 5 being 78.1%,  
212 80.9%, 84.2%, 86.9%, 89.3%, and 90.9%, respectively (Table 3).  
213 Subsequently, detailed subgroup analysis was conducted to assess the  
214 impact of various factors on the rates of COS5 and CCSS5. The  
215 expression rates of COS5 and CCSS5 varied across these subgroups,  
216 displaying distinct patterns over time. For COS5, there were persistent  
217 negligible or minor differences in survival between some subgroups  
218 ( $|d| < 0.1$ :  $\geq 2010$  vs.  $< 2010$ , Distal vs. Proximal, Grade II vs. Grade I, and  
219 T2 vs. T1;  $0.1 < |d| < 0.3$ : Widowed vs. Married and Separated/Divorced vs.  
220 Married). The differences in COS5 levels between some subgroups  
221 gradually appeared over time ( $|d| < 0.1 \rightarrow |d| > 0.1$ : Others vs. White and  
222 Chemotherapy Yes vs. None/Unknown). The disparity in COS5 rates  
223 among some subgroups slowly diminished over time ( $|d| > 0.1 \rightarrow |d| < 0.1$ ,  
224  $|d| > 0.3 \rightarrow |d| < 0.3$ , or  $|d| > 0.5 \rightarrow |d| < 0.5$ ; black vs. White, Others vs.  
225 proximal, grade III vs. Grade I, Grade IV vs. Grade I, Single vs. Married,  
226 Positive/Elevated vs. Negative/Normal, T3 vs. T1, T4 vs. T1, N1 vs. N0,  
227 and N2 vs. N0). Over time, the variance in the COS5 rate fluctuated  
228 irregularly across other subgroups. Correspondingly, for CCSS5, there  
229 were persistent negligible differences in survival between some  
230 subgroups ( $|d| < 0.1$ : others vs. white,  $\geq 2010$  vs.  $< 2010$ , mucinous  
231 adenocarcinoma vs. adenocarcinoma, widowed vs. Married and T2 vs. T1).

232 The variance in CCSS5 among the subgroups became increasingly  
233 evident as time progressed ( $|d| < 0.1 \rightarrow |d| > 0.1$ : Distal vs. Proximal). Over  
234 time, there was a gradual reduction in the differences in CCSS5 rates  
235 within certain subgroups ( $|d| > 0.1 \rightarrow |d| < 0.1$ ,  $|d| > 0.3 \rightarrow |d| < 0.3$ , or  $|d| > 0.5 \rightarrow$   
236  $|d| < 0.5$ : black vs. White, Grade II vs. Grade I, Grade IV vs. Grade I,  $\geq 5$   
237 cm vs.  $< 5$  cm, single vs. Married, Positive/Elevated vs. Negative/Normal,  
238 T3 vs. T1, T4 vs. T1, N1 vs. N0, and N2 vs. N0). The differences in the  
239 CCSS5 rate among the other subgroups fluctuated irregularly over time.

240 **Variables linked to the OS and CSS in patients who have attained a**  
241 **defined duration of survival**

242 Age, race, sex, year of diagnosis, site, grade, marital status, CEA level, T  
243 stage, N stage, and chemotherapy were independent prognostic factors for  
244 OS at baseline (Table 4 and Supplementary Table 1). The prognostic  
245 factors for patients who survived for at least one year differed from those  
246 at baseline, including age, race, sex, marital status, CEA levels, T stage, N  
247 stage, and chemotherapy. After three years, age, race, sex, histology type,  
248 marital status, CEA levels, T stage, N stage, and chemotherapy  
249 independently affected OS. At the 5-year mark, age, race, sex, marital  
250 status, CEA levels, T stage, and chemotherapy were key predictors of OS,  
251 consistent with the baseline and other survival intervals.

252 Age, year of diagnosis, site, grade, marital status, CEA, T stage, N stage,  
253 and chemotherapy were determined to be independent prognostic factors

254 for cancer-specific survival (CSS) at baseline, as indicated in Table 5 and  
255 Supplementary Table 2. After a minimum of one year of survival, age,  
256 CEA levels, T stage, N stage, and chemotherapy remained significant risk  
257 factors for CSS. For patients who survived beyond three years, age, sex,  
258 tumor location, marital status, CEA levels, T stage, and N stage emerged  
259 as influential factors. Among those who surpassed a five-year milestone,  
260 age, tumor site, CEA level, and T stage were independent prognostic  
261 factors. Constant predictors of CSS for newly diagnosed patients and 1-,  
262 3-, and 5-year survivors were age, CEA, and T stage.

### 263 **Conditional nomogram construction and validation**

264 Figure 2 and 3 illustrate the OS and CSS nomograms developed for  
265 cancer patients at different stages of their journey, including the start and  
266 at the one-year, three-year, and five-year milestones. These nomograms  
267 consider the specific risk factors for each individual. Our investigation  
268 delved deeper into the performances of these nomograms. Baseline  
269 analysis of the OS nomogram in the training set revealed an area under  
270 the curve (AUC) of 0.703, 0.713, and 0.713 for the one-year, three-year,  
271 and five-year intervals, respectively (Figure 4). In the test set, the  
272 corresponding AUC were 0.714, 0.722, and 0.719, respectively  
273 (Supplementary Figure 2). For patients who survived for at least one year,  
274 the OS nomogram showed AUC of 0.700, 0.697, and 0.698 in the training  
275 set and 0.698, 0.694, and 0.701 in the test set, respectively, for the same

276 intervals. For patients surviving for 3 years, the OS nomogram achieved  
277 AUC of 0.652, 0.665, and 0.694 in the training set and 0.663, 0.666, and  
278 0.688 in the test set, respectively. Additionally, for patients surviving 5  
279 years, the training set's OS nomogram yielded AUC of 0.661, 0.694, and  
280 0.695 for the one-year, three-year, and five-year durations. In the test set,  
281 AUC were 0.590, 0.674, and 0.681 for the same intervals. Regarding the  
282 CSS nomogram, at baseline, the training cohort demonstrated AUC  
283 values of 0.771, 0.788, and 0.782 for the one-year, three-year, as well as  
284 five-year periods (Figure 5), while the test cohort achieved corresponding  
285 AUC values of 0.787, 0.804, and 0.800, respectively (Supplementary  
286 Figure 3). For patients who survived for 1 year, the training cohort CSS  
287 nomogram attained AUC of 0.785, 0.795, and 0.781 for the one-year,  
288 three-year, and five-year intervals, whereas the test cohort displayed AUC  
289 of 0.780, 0.778, and 0.761, respectively. Among patients surviving 3  
290 years, the training cohort showed AUC of 0.765, 0.732, and 0.727 over  
291 the one-year, three-year, and five-year periods, whereas the test cohort  
292 displayed AUC of 0.786, 0.732, and 0.697, respectively, for the same  
293 duration. For patients who survived for 5 years, the training cohort CSS  
294 nomogram achieved AUC values of 0.664, 0.669, and 0.682 for the  
295 one-year, three-year, and five-year periods, whereas the test cohort  
296 showed AUC values of 0.585, 0.629, and 0.655, respectively.

297 The calibration curves of the OS and CCS nomograms when utilized for

298 these training and validation sets are also presented. The outcomes  
299 demonstrated strong concordance between anticipated and observed  
300 survival rates in both the training and validation sets, indicating the  
301 accuracy of these nomograms in predicting survival probabilities  
302 (Supplementary Figure 4-7). In addition, the DCA curves also indicated  
303 the favorable clinical utility of these nomograms (Supplementary Figure  
304 8-11).

305

#### 306 **4. Discussion**

307 In this investigation, we examined the survival data of elderly patients  
308 with non-metastatic colon cancer who had undergone colectomy in detail.  
309 The uniqueness and notable attributes of our research encompass the  
310 following: we conducted an analysis of the CS rates, allowing for a more  
311 precise assessment of OS and CSS outcomes in both medium-term and  
312 long-term survivors; this analysis aids in accurately forecasting survival  
313 rates and advancing personalized medical approaches; our findings  
314 revealed the nomograms to possess favorable discriminatory and  
315 predictive capabilities when forecasting OS and CSS rates.

316 In the coming years, we expect a higher incidence of colon cancer in the  
317 elderly population. This can be attributed to a longer life expectancy and  
318 improved rates of survival<sup>18</sup>. Colectomy is the primary curative treatment  
319 for the elderly. Previous studies have reported a notable correlation

320 between surgical resection and improved prognosis in older patients with  
321 colon cancer<sup>8-9,19</sup>. However, the prognosis of elderly patients differs from  
322 that of younger individuals owing to the presence of other health  
323 conditions, functional disabilities, more advanced tumors, and a  
324 decreased ability to maintain internal balance. Elderly patients experience  
325 higher rates of complications and mortality following surgery as well as a  
326 less favorable overall outlook<sup>3,20</sup>. Given the complexities surrounding  
327 older adults with colon cancer, there is an urgent need for further research  
328 focusing on this demographic, particularly on those who have undergone  
329 surgical procedures. Currently, there is limited information on the  
330 medium- and long-term postoperative prognoses of elderly patients with  
331 colon cancer, and few studies have investigated the practical application  
332 of prediction models specifically tailored to this population. Wang<sup>21</sup> et al.  
333 developed a prognostic model that accurately predicted the outcomes of  
334 elderly patients with colorectal cancer. However, their study included  
335 patients with and without metastatic disease, and it is widely recognized  
336 that prognosis differs significantly between these two groups.  
337 Additionally, their study focused only on CSS and not OS. To our  
338 knowledge, this study is the first to investigate the development and  
339 validation of a reliable nomogram for predicting both OS and CSS in  
340 elderly adults with non-metastatic colon cancer who have undergone  
341 colectomy. This model is expected to provide patients and healthcare

342 providers with a valuable tool for guiding follow-up care and treatment  
343 decisions.

344 CS provides a precise estimation of the likelihood of a specific time point  
345 in the course of a disease, closely tied to individual long-term survival  
346 rates based on patients' time of survival<sup>11</sup>. This allows for a more accurate  
347 depiction of prognostic outcomes. To our knowledge, this study is the  
348 first to show CS in elderly individuals with non-metastatic colon cancer  
349 who have undergone colectomy. In this study, survival analysis revealed  
350 an upward trend in actuarial OS and CSS among elderly patients as their  
351 survival duration increased annually. However, COS and CCSS rates  
352 showed contrasting patterns. Initially, the COS5 rates experienced a slight  
353 increase, followed by a subsequent decrease, whereas the CCSS5 rates  
354 demonstrated a consistent upward trend over the five-year duration.  
355 Compared with the previously noted trend of annual increases in the  
356 likelihood of COS rates for malignant tumors<sup>11,13</sup>, particularly CRC, this  
357 study revealed a distinctive pattern of change in COS rates. Our  
358 hypothesis attributed this variance to disparity in the cohort composition.  
359 This study differs from previous research by exclusively focusing on  
360 older adults instead of encompassing individuals across all age groups.  
361 Throughout the course of follow-up, the impact of non-colon  
362 cancer-related death determinants accumulated at various stages of the  
363 life course, leading to a growing risk of other conditions such as



364 cardiovascular and cerebrovascular diseases among elderly patients with  
365 colon cancer. a recent study<sup>22</sup>, it was found that the majority of deaths in  
366 patients aged > 80 years during the follow-up period were unrelated to  
367 CRC. Non-CRC-related causes of death, such as respiratory failure,  
368 particularly aspiration pneumonia, cardiovascular disease, and sepsis,  
369 were the primary contributors to mortality. Another study suggested that  
370 cerebrovascular-specific hazard ratios were 3.10-, 6.67, and 10.95 times  
371 greater for CRC patients aged 50-64, 65-74, and over 75 years,  
372 respectively, compared to those under 50 years old<sup>23</sup>. One of the foremost  
373 concerns for those who survive cancer is the risk of mortality. Although  
374 the risk of death due to colon cancer surpasses that of other illnesses in  
375 the initial years, this specific risk diminishes over time in a discernible  
376 trend. Our research showed that over the span of five years, the CCSS5  
377 showed a consistent increase, with the baseline and subsequent  
378 conditional survival rates at years 1 through 5 documented as 78.1%,  
379 80.9%, 84.2%, 86.9%, 89.3%, and 90.9%, respectively, indicating a  
380 positive trend. The findings from the CS analysis could instill greater  
381 optimism in the patients. For instance, consider a patient who initially has  
382 a 5-year CSS of 78.1% at the time of diagnosis. Subsequently, through  
383 dedicated adherence to treatment and follow-up, the patient successfully  
384 achieved 5-year survival, and the CS analysis conveyed the encouraging  
385 news: "Your 5-year CSS rate has risen to 90.9%." On the other hand, in

386 contrast to the general population's COS outcomes, the comparatively  
387 less positive COS outcomes in the elderly indicate a greater need for  
388 physicians to prioritize non-colonic causes of death as patients age.  
389 Subgroup analysis was performed to further understand the influence of  
390 different variables on CS. The rates of COS5 and CCSS5 expression  
391 varied in these subgroups. Over time, the variation in the rates of both  
392 COS5 and CCSS5 among many subgroups gradually decreased (black vs.  
393 White, Grade IV vs. Grade I, Single vs. Married, Positive/Elevated vs.  
394 Negative/Normal, T3 vs. T1, T4 vs. T1, N1 vs. N0, and N2 vs. N0). One  
395 possible explanation is that patients in each subgroup with some high-risk  
396 factors died over time, whereas the remaining patients had a better  
397 prognosis, resulting in a smaller difference in survival between the  
398 subgroups. The change patterns of COS5 and CCSS5 differed among the  
399 subgroups, which may be influenced by multiple factors, such as those  
400 affecting cardiovascular death. Future studies of CS in these subgroups  
401 should be conducted.

402 Our study examined the impact of various baseline prognostic factors on  
403 patients with different survival durations. Multiple factors, including age,  
404 race, sex, year of diagnosis, site, grade, marital status, carcinoembryonic  
405 antigen (CEA) levels, T stage, N stage, and chemotherapy, significantly  
406 influenced OS according to multifactor analysis. Upon reaching the  
407 critical 5-year survival milestone, we identified several key independent

408 prognostic factors that consistently influenced the patient outcomes.  
409 These factors included age, race, sex, marital status, CEA levels, T stage,  
410 and chemotherapy, demonstrating a predictive value for OS across  
411 baseline and 1-year, 3-year, and 5-year intervals. Furthermore, we  
412 observed that at the beginning of the study, age, year of diagnosis, site,  
413 grade, marital status, CEA levels, T stage, N stage, and chemotherapy  
414 independently influenced CSS. However, as time progressed, only age,  
415 CEA level, and T stage consistently emerged as predictive factors for CSS  
416 in both newly diagnosed patients and those who survived for 1, 3, and 5  
417 years. These variables, as observed in previous studies, could predict OS  
418 and CSS at the beginning of diagnosis<sup>15,19,21</sup>, but their predictive  
419 significance diminished over time. To provide more accurate prognostic  
420 predictions, we utilized these variables to create nomograms for each type  
421 of survival, which demonstrated good prediction performance and a  
422 correspondingly good match between the predicted and observed survival  
423 rates in the calibration plots. The practical application of these  
424 nomograms is also supported by their favorable clinical utility, as shown  
425 in the DCA curves. However, it should be noted that, as time progressed,  
426 the AUC values of the nomograms gradually declined, indicating a  
427 decrease in predictive accuracy. This trend can be explained by the  
428 diminishing impact of clinicopathological factors on the prognosis over  
429 time. Further research is needed to assess the latest clinical and laboratory

430 factors at specific time points to more accurately identify prognostic  
431 factors affecting elderly colon cancer survivors. This study had some  
432 limitations. First, given the retrospective nature of the study, it inevitably  
433 introduced a degree of selection bias owing to its inherent design. Second,  
434 obtaining postoperative complications and adjuvant treatment details  
435 from the SEER database for all patients is not feasible, potentially  
436 impacting the survival prognosis of elderly individuals with colon cancer.  
437 Third, the analysis of CS necessitates extensive data, thus posing  
438 challenges for the external validation of these nomograms. Furthermore,  
439 the ongoing update of nomograms is essential to accommodate the  
440 evolving treatment strategies.

441

## 442 **5. Conclusion**

443 We reported the rates of CS in elderly non-metastatic colon cancer  
444 patients following colectomy, enhancing our understanding of survival  
445 rates in the medium- and long-term. We also created personalized CS  
446 nomograms to predict mortality risk at different intervals. These tools aid  
447 surgeons and patients in making informed decisions, and contribute to  
448 personalized medicine.

449

450

451

452

453 **Table 1.** Baseline characteristics of enrolled patients

454 **Table 2.** Five-year conditional overall survival rates (%).

455 **Table 3.** Five-year conditional colon-specific survival rates (%).

456 **Table 4.** Multivariate analyses of overall deaths in baseline,  $\geq$  one-, three-,  
457 five-year survivors in the training cohort.

458 **Table 5.** Multivariate analyses of colon-specific deaths in baseline,  $\geq$  one-,  
459 three-, five-year survivors in the training cohort.

460

461 **Figure 1.** Conditional survival analysis of elderly non-metastatic colon  
462 cancer patients who undergo colectomy. (A) Kaplan–Meier curves  
463 estimating overall survival for individuals who had successfully survived  
464 a duration of 0-6 years. (B) Kaplan–Meier curves estimating  
465 colon-specific survival for individuals who had successfully survived a  
466 duration of 0-6 years.

467 **Figure 2.** Nomograms to predict one-, three-, and five- overall survival  
468 for baseline (A), one-year (B), three-year (C), and five-year (D)  
469 survivors.

470 **Figure 3.** Nomograms to predict one-, three-, and five-year colon-specific  
471 survival for baseline (A), one-year (B), three-year (C), and five-year (D)  
472 survivors.

473 **Figure 4.** ROC curve analyses in the training cohort for one-, three-, and

474 five-year overall survival in baseline (A), one-year (B), three-year (C),  
475 and five-year (D) survivors. ROC, receiver operator characteristic curve;  
476 AUC, area under the curve.

477 **Figure 5.** ROC curve analyses in the training cohort for one-, three-, and  
478 five-year colon-specific survival in baseline (A), one-year (B), three-year  
479 (C), and five-year (D) survivors. ROC, receiver operator characteristic  
480 curve; AUC, area under the curve.

481

482 **Supplementary Table 1.** Univariate analyses of overall deaths in  
483 baseline,  $\geq$  one-, three- and five-year survivors in the training cohort.

484 **Supplementary Table 2.** Univariate analysis of colon-specific deaths at  
485 baseline,  $\geq$  one-, three- and five-year survivors in the training cohort.

486 **Supplementary Figure 1.** Flow diagram for enrollment of the study  
487 cohort.

488 **Supplementary Figure 2.** ROC curve analyses in the test cohort for one-,  
489 three-, and five-year overall survival in baseline (A), one-year (B),  
490 three-year (C), and five-year (D) survivors. ROC, receiver operator  
491 characteristic curve; AUC, area under the curve.

492 **Supplementary Figure 3.** ROC curve analyses in the test cohort for one-,  
493 three-, and five-year colon-specific survival in baseline (A), one-year (B),  
494 three-year (C), and five-year (D) survivors. ROC, receiver operator  
495 characteristic curve; AUC, area under the curve.

496 **Supplementary Figure 4.** Calibration curves of baseline nomograms. (A,  
497 C and E) showed Calibration curves of nomograms in predicting one-,  
498 three-, and five-year OS, respectively. (B, D and F) showed Calibration  
499 curves of nomograms in predicting one-, three-, and five-year CSS,  
500 respectively. OS, overall survival; CSS, colon-specific survival.

501 **Supplementary Figure 5.** Calibration curves of one-year survivors  
502 nomograms. (A, C and E) showed Calibration curves of nomograms in  
503 predicting one-, three-, and five-year OS, respectively. (B, D and F)  
504 showed Calibration curves of nomograms in predicting one-, three-, and  
505 five-year CSS, respectively. OS, overall survival; CSS, colon-specific  
506 survival.

507 **Supplementary Figure 6.** Calibration curves of three-year survivors  
508 nomograms in the training cohort. (A, C and E) showed Calibration  
509 curves of nomograms in predicting one-, three-, and five-year OS,  
510 respectively. (B, D and F) showed Calibration curves of nomograms to  
511 predict one-, three-, and five-year CSS, respectively. OS, overall survival;  
512 CSS, colon-specific survival.

513 **Supplementary Figure 7.** Calibration curves of five-year survivors  
514 nomograms in the training cohort. (A, C and E) showed Calibration  
515 curves of nomograms in predicting one-, three-, and five-year OS,  
516 respectively. (B, D and F) showed Calibration curves of nomograms in  
517 predicting one-, three-, and five-year CSS, respectively. OS, overall

518 survival; CSS, colon-specific survival.

519 **Supplementary Figure 8.** Decision curve analysis for overall survival  
520 nomograms in the training cohort. A, patients at baseline; B, Patients who  
521 have survived for one year; C, Patients who have survived for three years;  
522 D, Patients who have survived for five years.

523 **Supplementary Figure 9.** Decision curve analysis for overall survival  
524 nomograms in the test cohort. A, patients at baseline; B, patients who  
525 have survived for one year; C, patients who have survived for three years;  
526 D, patients who have survived for five years.

527 **Supplementary Figure 10.** Decision curve analysis for colon-specific  
528 survival nomograms in the training cohort. A, patients at baseline; B,  
529 patients who have survived for one year; C, patients who have survived  
530 for three years; D, patients who have survived for five years.

531 **Supplementary Figure 11.** Decision curve analysis for colon-specific  
532 survival nomograms in the test cohort. A, patients at baseline; B, patients  
533 who have survived for one year; C, patients who have survived for three  
534 years; D, patients who have survived for five years.

535

## 536 **Reference**

537 1. Miller KD, Nogueira L, Mariotto AB, et al. Cancer treatment and  
538 survivorship statistics, 2019. *CA Cancer J Clin.* 2019;69(5):363-385.

539 2. Papamichael D, Audisio RA, Glimelius B, et al. Treatment of



- 540 colorectal cancer in older patients: International Society of Geriatric  
541 Oncology (SIOG) consensus recommendations 2013. *Ann Oncol.*  
542 2015;26(3):463–476.
- 543 3. Ioffe D, Dotan E. Guidance for Treating the Older Adults with  
544 Colorectal Cancer. *Curr Treat Options Oncol.* 2023;24(6):644-666.
- 545 4. Chen J, Zhang C, Wu Y. Does adjuvant chemotherapy improve  
546 outcomes in elderly patients with colorectal cancer? A systematic review  
547 and meta-analysis of real-world studies. *Expert Rev Gastroenterol*  
548 *Hepatol.* 2022;16(4):383-391.
- 549 5. Choi DW, Kang H, Zhang HS, Jhang H, Jeong W, Park S. Association  
550 of polypharmacy with all-cause mortality and adverse events among  
551 elderly colorectal cancer survivors. *Cancer.* 2023;129(17):2705-2716.
- 552 6. Sanoff HK, Carpenter WR, Stürmer T, et al. Effect of adjuvant  
553 chemotherapy on survival of patients with stage III colon cancer  
554 diagnosed after age 75 years. *J Clin Oncol.* 2012;30(21):2624-2634. ,
- 555 7. Mitry E, Bouvier AM, Esteve J, et al. Improvement in colorectal  
556 cancer survival: a population-based study. *Eur J Cancer.*  
557 2005;41(15):2297-2303.
- 558 8. Bhangu A, Kiran RP, Audisio R, Tekkis P. Survival outcome of  
559 operated and non-operated elderly patients with rectal cancer: A  
560 Surveillance, Epidemiology, and End Results analysis. *Eur J Surg Oncol.*  
561 2014;40(11):1510-1516.

- 562 9. Zhang L, Li Q, Hu C, Zhang Z, She J, Shi F. Real-world analysis of  
563 survival benefit of surgery and adjuvant therapy in elderly patients with  
564 colorectal cancer. *Sci Rep.* 2023;13(1):14866.
- 565 10. Ioffe D, Dotan E. Guidance for Treating the Older Adults with  
566 Colorectal Cancer. *Curr Treat Options Oncol.* 2023;24(6):644-666.
- 567 11. Hagens ERC, Feenstra ML, Eshuis WJ, et al. Conditional survival  
568 after neoadjuvant chemoradiotherapy and surgery for oesophageal cancer.  
569 *Br J Surg.* 2020;107(8):1053-1061.
- 570 12. Qaderi SM, Dickman PW, de Wilt JHW, et al. Conditional Survival  
571 and Cure of Patients With Colon or Rectal Cancer: A Population-Based  
572 Study. *J Natl Compr Canc Netw.* 2020;18(9):1230-1237.
- 573 13. Han L, Dai W, Mo S, et al. Nomogram of conditional survival  
574 probability of long-term Survival for Metastatic Colorectal Cancer: A  
575 Real-World Data Retrospective Cohort Study from SEER database. *Int J*  
576 *Surg.* 2021;92:106013.
- 577 14. Karagkounis G, Liska D, Kalady MF. Conditional Probability of  
578 Survival After Neoadjuvant Chemoradiation and Proctectomy for Rectal  
579 Cancer: What Matters and When. *Dis Colon Rectum.* 2019;62(1):33-39.
- 580 15. Yu C, Zhang Y. Establishment of prognostic nomogram for elderly  
581 colorectal cancer patients: a SEER database analysis. *BMC Gastroenterol.*  
582 2020;20(1):347.
- 583 16. Kurta ML, Edwards RP, Moysich KB, et al. Prognosis and conditional

- 584 disease-free survival among patients with ovarian cancer. *J Clin Oncol.*  
585 2014;32(36):4102-4112.
- 586 17. Cucchetti A, Piscaglia F, Cescon M, et al. Conditional survival after  
587 hepatic resection for hepatocellular carcinoma in cirrhotic patients. *Clin*  
588 *Cancer Res.* 2012;18(16):4397-4405.
- 589 18. Quaglia A, Tavilla A, Shack L, et al. The cancer survival gap between  
590 elderly and middle-aged patients in Europe is widening. *Eur J Cancer.*  
591 2009;45(6):1006–1016.
- 592 19. Zheng P, Lai C, Yang W, et al. Nomogram predicting cancer-specific  
593 survival in elderly patients with stages I-III colon cancer. *Scand J*  
594 *Gastroenterol.* 2020;55(2):202-208.
- 595 20. Bouvier AM, Launoy G, Lepage C et al. Trends in the management  
596 and survival of digestive tract cancers among patients aged over 80 years.  
597 *Aliment Pharmacol Ther.* 2005;22(3):233-241.
- 598 21. Wang Z, Wang Y, Yang Y, et al. A competing-risk nomogram to  
599 predict cause-specific death in elderly patients with colorectal cancer  
600 after surgery (especially for colon cancer). *World J Surg Oncol.*  
601 2020;18(1):30.
- 602 22. Ogata T, Yoshida N, Sadakari Y, et al. Colorectal cancer surgery in  
603 elderly patients 80 years and older: a comparison with younger age  
604 groups. *J Gastrointest Oncol.* 2022;13(1):137-148.
- 605 23. Dai ZH, Tang M, Chen YL, et al. Incidence and Risk Factors for

606 Cerebrovascular-Specific Mortality in Patients with Colorectal Cancer: A

607 Registry-Based Cohort Study Involving 563,298 Patients. *Cancers*

608 (Basel). 2022;14(9):2053. Published 2022 Apr 19.

609

1 Table 1 Baseline characteristics of enrolled patients

|                         | Total ( N=9302) | Train (N=6511) | Test (N=2791) | p     |
|-------------------------|-----------------|----------------|---------------|-------|
| Age                     | 78.6 (5.42)     | 78.6 (5.44)    | 78.6 (5.40)   | 0.894 |
| Race                    |                 |                |               | 0.360 |
| White                   | 7533 (81.0%)    | 5293 (81.3%)   | 2240 (80.3%)  |       |
| Black                   | 532 (5.72%)     | 359 (5.51%)    | 173 (6.20%)   |       |
| Others                  | 1237 (13.3%)    | 859 (13.2%)    | 378 (13.5%)   |       |
| Sex:                    |                 |                |               | 0.744 |
| Male                    | 3964 (42.6%)    | 2767 (42.5%)   | 1197 (42.9%)  |       |
| Female                  | 5338 (57.4%)    | 3744 (57.5%)   | 1594 (57.1%)  |       |
| Year of Diagnosis:      |                 |                |               | 0.643 |
| < 2010                  | 4165 (44.8%)    | 2926 (44.9%)   | 1239 (44.4%)  |       |
| ≥ 2010                  | 5137 (55.2%)    | 3585 (55.1%)   | 1552 (55.6%)  |       |
| Site:                   |                 |                |               | 0.100 |
| Proximal                | 6802 (73.1%)    | 4803 (73.8%)   | 1999 (71.6%)  |       |
| Distal                  | 2383 (25.6%)    | 1629 (25.0%)   | 754 (27.0%)   |       |
| Others                  | 117 (1.26%)     | 79 (1.21%)     | 38 (1.36%)    |       |
| Grade:                  |                 |                |               | 0.689 |
| Grade I                 | 618 (6.64%)     | 436 (6.70%)    | 182 (6.52%)   |       |
| Grade II                | 6532 (70.2%)    | 4549 (69.9%)   | 1983 (71.0%)  |       |
| Grade III               | 1828 (19.7%)    | 1299 (20.0%)   | 529 (19.0%)   |       |
| Grade IV                | 324 (3.48%)     | 227 (3.49%)    | 97 (3.48%)    |       |
| Histology Type:         |                 |                |               | 0.199 |
| Adenocarcinoma          | 8343 (89.7%)    | 5834 (89.6%)   | 2509 (89.9%)  |       |
| Mucinous adenocarcinoma | 769 (8.27%)     | 533 (8.19%)    | 236 (8.46%)   |       |
| Others                  | 190 (2.04%)     | 144 (2.21%)    | 46 (1.65%)    |       |
| Tumor Size:             |                 |                |               | 0.961 |
| < 5 cm                  | 5394 (58.0%)    | 3774 (58.0%)   | 1620 (58.0%)  |       |
| ≥5 cm                   | 3908 (42.0%)    | 2737 (42.0%)   | 1171 (42.0%)  |       |
| Marital Status:         |                 |                |               | 0.305 |
| Married                 | 4803 (51.6%)    | 3372 (51.8%)   | 1431 (51.3%)  |       |
| Single                  | 831 (8.93%)     | 566 (8.69%)    | 265 (9.49%)   |       |
| Widowed                 | 2892 (31.1%)    | 2045 (31.4%)   | 847 (30.3%)   |       |
| Separated/Divorced      | 776 (8.34%)     | 528 (8.11%)    | 248 (8.89%)   |       |
| CEA:                    |                 |                |               | 0.535 |
| Negative/Normal         | 5825 (62.6%)    | 4091 (62.8%)   | 1734 (62.1%)  |       |
| Positive/elevated       | 3477 (37.4%)    | 2420 (37.2%)   | 1057 (37.9%)  |       |
| T stage:                |                 |                |               | 0.282 |
| T1                      | 743 (7.99%)     | 513 (7.88%)    | 230 (8.24%)   |       |
| T2                      | 1553 (16.7%)    | 1086 (16.7%)   | 467 (16.7%)   |       |
| T3                      | 5697 (61.2%)    | 4022 (61.8%)   | 1675 (60.0%)  |       |
| T4                      | 1309 (14.1%)    | 890 (13.7%)    | 419 (15.0%)   |       |
| N stage:                |                 |                |               | 0.576 |
| N0                      | 5899 (63.4%)    | 4141 (63.6%)   | 1758 (63.0%)  |       |
| N1                      | 2290 (24.6%)    | 1606 (24.7%)   | 684 (24.5%)   |       |
| N2                      | 1113 (12.0%)    | 764 (11.7%)    | 349 (12.5%)   |       |

|               |              |              |              |  |       |
|---------------|--------------|--------------|--------------|--|-------|
| Radiation     |              |              |              |  | 0.177 |
| None/Unknown  | 9228 (99.2%) | 6465 (99.3%) | 2763 (99.0%) |  |       |
| Yes           | 74 (0.80%)   | 46 (0.71%)   | 28 (1.00%)   |  |       |
| Chemotherapy: |              |              |              |  | 0.468 |
| None/Unknown  | 7206 (77.5%) | 5030 (77.3%) | 2176 (78.0%) |  |       |
| Yes           | 2096 (22.5%) | 1481 (22.7%) | 615 (22.0%)  |  |       |

Table 2 Five-year conditional overall survival rates (%).

| Variables                                      | At baseline | At 1 year | At 2 years | At 3 years | At 4 years | At 5 years |
|------------------------------------------------|-------------|-----------|------------|------------|------------|------------|
| Total                                          | 62.5        | 63.2      | 62.8       | 62.1       | 61.6       | 59.8       |
| Race                                           |             |           |            |            |            |            |
| White                                          | 62.4        | 63.0      | 62.2       | 61.4       | 60.6       | 58.8       |
| Black                                          | 56.9        | 58.1      | 59.5       | 56.7       | 58.0       | 57.2       |
| Others                                         | 65.6        | 66.4      | 67.4       | 68.1       | 68.8       | 66.7       |
| d (Black vs. White)                            | -0.114      | -0.102    | -0.056     | -0.097     | -0.053     | -0.032     |
| d (Others vs. White)                           | 0.066       | 0.071     | 0.108      | 0.138      | 0.167      | 0.161      |
| Sex                                            |             |           |            |            |            |            |
| Male                                           | 60.2        | 60.3      | 59.1       | 58.6       | 58.3       | 58.1       |
| Female                                         | 64.3        | 65.3      | 65.6       | 64.6       | 64.0       | 61.0       |
| d (Female vs. Male)                            | 0.085       | 0.104     | 0.134      | 0.124      | 0.117      | 0.059      |
| Year of diagnosis                              |             |           |            |            |            |            |
| < 2010                                         | 61.2        | 62.3      | 62.3       | 62.6       | 61.9       | 60.0       |
| ≥2010                                          | 63.5        | 63.9      | 63.3       | 61.3       | 61.1       | 60.3       |
| d (≥2010 vs. < 2010)                           | 0.048       | 0.033     | 0.021      | -0.028     | -0.016     | 0.006      |
| Site                                           |             |           |            |            |            |            |
| Poximal                                        | 62.6        | 63.4      | 63.5       | 62.5       | 62.3       | 60.1       |
| Distal                                         | 63.2        | 63.3      | 61.5       | 61.3       | 60.0       | 59.1       |
| Others                                         | 64.14       | 64.78     | 64.90      | 64.87      | 65.52      | 65.90      |
| d (Distal vs. Poximal)                         | 0.012       | -0.002    | -0.041     | -0.025     | -0.047     | -0.020     |
| d (Others vs. Poximal)                         | -0.438      | -0.323    | -0.300     | -0.284     | -0.146     | -0.022     |
| Grade                                          |             |           |            |            |            |            |
| Grade I                                        | 67.4        | 66.5      | 66.2       | 63.9       | 62.7       | 61.1       |
| Grade II                                       | 64.3        | 63.8      | 62.8       | 62.3       | 62.0       | 60.4       |
| Grade III                                      | 56.0        | 60.0      | 62.0       | 61.0       | 60.4       | 57.5       |
| Grade IV                                       | 53.3        | 60.9      | 59.3       | 58.5       | 55.5       | 57.2       |
| d (Grade II vs. Grade I)                       | -0.064      | -0.056    | -0.070     | -0.033     | -0.014     | -0.014     |
| d (Grade III vs. Grade I)                      | -0.235      | -0.135    | -0.087     | -0.060     | -0.047     | -0.073     |
| d (Grade IV vs. Grade I)                       | -0.291      | -0.116    | -0.143     | -0.111     | -0.148     | -0.080     |
| Histology type                                 |             |           |            |            |            |            |
| Adenocarcinoma                                 | 63.0        | 63.6      | 63.1       | 62.3       | 62.2       | 60.7       |
| Mucinous adenocarcinoma                        | 58.9        | 58.7      | 59.4       | 57.8       | 54.5       | 51.5       |
| Others                                         | 54.9        | 61.3      | 63.5       | 70.5       | 70.6       | 54.0       |
| d (Mucinous adenocarcinoma vs. Adenocarcinoma) | -0.085      | -0.102    | -0.077     | -0.093     | -0.158     | -0.188     |
| d (Others vs. Adenocarcinoma)                  | -0.167      | -0.048    | 0.008      | 0.169      | 0.173      | -0.137     |
| Tumor size                                     |             |           |            |            |            |            |
| < 5cm                                          | 65.5        | 65        | 63.5       | 63.3       | 63.5       | 61.8       |
| ≥5cm                                           | 58.4        | 60.5      | 61.7       | 60.2       | 58.7       | 56.7       |

|                |                                           |        |        |        |        |        |        |
|----------------|-------------------------------------------|--------|--------|--------|--------|--------|--------|
|                | d ( $\geq 5$ cm vs. $< 5$ cm)             | -0.147 | -0.093 | -0.037 | -0.064 | -0.099 | -0.104 |
| Marital status | Married                                   | 65.7   | 66.9   | 66.1   | 65.8   | 65.3   | 63.6   |
|                | Single                                    | 59.3   | 60.3   | 62.6   | 63.9   | 64.4   | 63.8   |
|                | Widowed                                   | 58.7   | 58.3   | 58     | 55.9   | 55.0   | 53.0   |
|                | Separated/Divorced                        | 60.2   | 61.0   | 59.9   | 59.4   | 59.4   | 56.8   |
|                | d (Single vs. Married)                    | -0.132 | -0.137 | -0.072 | -0.039 | -0.019 | 0.004  |
|                | d (Widowed vs. Married)                   | -0.145 | -0.178 | -0.168 | -0.204 | -0.212 | -0.216 |
| CEA            | d (Separated/Divorced vs. Married)        | -0.114 | -0.122 | -0.128 | -0.132 | -0.121 | -0.139 |
|                | Negative/Normal                           | 68.4   | 67.8   | 66.5   | 64.8   | 64.2   | 62.4   |
|                | Positive/Elevated                         | 52.6   | 54.8   | 55.7   | 56.6   | 55.9   | 53.9   |
| T stage        | d (Positive/Elevated vs. Negative/Normal) | -0.326 | -0.270 | -0.223 | -0.169 | -0.171 | -0.173 |
|                | T1                                        | 77.8   | 76.6   | 73.9   | 69.4   | 67.8   | 65.0   |
|                | T2                                        | 75.0   | 73.6   | 69.6   | 66.2   | 64.1   | 61.5   |
|                | T3                                        | 62.1   | 61.8   | 61.4   | 61.3   | 60.9   | 59.4   |
|                | T4                                        | 40.6   | 46.1   | 50.0   | 51.8   | 54.0   | 53.1   |
|                | d (T2 vs. T1)                             | -0.058 | -0.062 | -0.089 | -0.066 | -0.076 | -0.071 |
|                | d (T3 vs. T1)                             | -0.324 | -0.307 | -0.259 | -0.167 | -0.142 | -0.114 |
| N stage        | d (T4 vs. T1)                             | -0.768 | -0.632 | -0.494 | -0.363 | -0.284 | -0.243 |
|                | N0                                        | 70.0   | 69.0   | 66.4   | 64.1   | 62.8   | 60.1   |
|                | N1                                        | 54.9   | 56.4   | 58.1   | 58.9   | 58.9   | 58.3   |
|                | N2                                        | 38.3   | 42.6   | 48.3   | 53.9   | 58.5   | 61.2   |
|                | d (N1 vs. N0)                             | -0.312 | -0.261 | -0.172 | 0.107  | -0.080 | -0.037 |
|                | d (N2 vs. N0)                             | -0.655 | -0.547 | -0.374 | -0.210 | -0.088 | 0.022  |
| Radiation      | None/Unknown                              | 62.6   | 63.2   | 62.8   | 62.1   | 61.7   | 59.9   |
|                | Yes                                       | 47.3   | 52.8   | 58.3   | 56.1   | 44.5   | 45.7   |
|                | d (Yes vs. None/Unknown)                  | -0.316 | -0.216 | -0.093 | -0.124 | -0.354 | -0.290 |
| Chemotherapy   | None/Unknown                              | 62.4   | 63.0   | 62.0   | 60.5   | 59.8   | 57.5   |
|                | Yes                                       | 62.9   | 63.7   | 65.6   | 67.4   | 67.7   | 67.9   |
|                | d (Yes vs. None/Unknown)                  | 0.010  | 0.015  | 0.074  | 0.142  | 0.162  | 0.212  |

6 Table 3 Five-year conditional colon-specific survival rates (%).

| Variables         |                      | At baseline | At 1 year | At 2 years | At 3 years | At 4 years | At 5 years |
|-------------------|----------------------|-------------|-----------|------------|------------|------------|------------|
| Total             |                      | 78.1        | 80.9      | 84.2       | 86.9       | 89.3       | 90.9       |
| Race              |                      |             |           |            |            |            |            |
|                   | White                | 78.3        | 81.5      | 84.8       | 87.3       | 89.5       | 90.8       |
|                   | Black                | 73.1        | 74.5      | 79.1       | 82.5       | 86.5       | 89.5       |
|                   | Others               | 78.4        | 80.0      | 82.2       | 86.2       | 89.4       | 90.4       |
|                   | d (Black vs. White)  | -0.126      | -0.178    | -0.156     | -0.142     | -0.097     | -0.045     |
|                   | d (Others vs. White) | 0.002       | -0.038    | -0.071     | -0.033     | -0.003     | -0.014     |
| Sex               |                      |             |           |            |            |            |            |
|                   | Male                 | 77.8        | 80.0      | 82.4       | 84.7       | 87.7       | 89.3       |
|                   | Female               | 78.3        | 81.6      | 85.4       | 88.5       | 90.5       | 91.6       |
|                   | d (Female vs. Male)  | 0.012       | 0.041     | 0.082      | 0.113      | 0.090      | 0.080      |
| Year of diagnosis |                      |             |           |            |            |            |            |
|                   | < 2010               | 77.1        | 80.1      | 83.8       | 87.0       | 89.3       | 90.9       |

|                |                                                |        |        |        |        |        |        |
|----------------|------------------------------------------------|--------|--------|--------|--------|--------|--------|
|                | ≥2010                                          | 78.9   | 81.7   | 84.4   | 86.7   | 89.2   | 89.6   |
|                | d (≥2010 vs. < 2010)                           | 0.044  | 0.041  | 0.016  | -0.009 | -0.003 | -0.045 |
| Site           | Poximal                                        | 78.1   | 81.5   | 85.6   | 88.2   | 90.7   | 91.9   |
|                | Distal                                         | 78.3   | 79.7   | 80.6   | 83.7   | 86.0   | 87.5   |
|                | Others                                         | 68.1   | 74.9   | 77.6   | 82.7   | 85.5   | 91.2   |
|                | d (Distal vs. Poximal)                         | 0.005  | -0.046 | -0.137 | -0.133 | -0.152 | -0.153 |
|                | d (Others vs. Poximal)                         | -0.242 | -0.168 | -0.219 | -0.163 | -0.168 | -0.024 |
| Grade          | Grade I                                        | 85.6   | 86.2   | 87.9   | 89.1   | 91.3   | 92.6   |
|                | Grade II                                       | 80.0   | 81.5   | 84.0   | 86.7   | 89.4   | 90.7   |
|                | Grade III                                      | 70.5   | 77.4   | 83.6   | 86.7   | 88.1   | 89.2   |
|                | Grade IV                                       | 67.2   | 77.2   | 82.4   | 87.7   | 89.7   | 94.3   |
|                | d (Grade II vs. Grade I)                       | -0.135 | -0.120 | -0.107 | -0.071 | -0.061 | -0.066 |
|                | d (Grade III vs. Grade I)                      | -0.365 | -0.224 | -0.118 | -0.071 | -0.104 | -0.118 |
|                | d (Grade IV vs. Grade I)                       | -0.445 | -0.229 | -0.151 | -0.041 | -0.052 | 0.059  |
| Histology type | Adenocarcinoma                                 | 78.5   | 81.2   | 84.3   | 86.9   | 89.3   | 90.8   |
|                | Mucinous adenocarcinoma                        | 76.3   | 78.7   | 83.5   | 86.9   | 89.3   | 88.6   |
|                | Others                                         | 64.6   | 76.0   | 82.1   | 91.3   | 92.3   | NA     |
|                | d (Mucinous adenocarcinoma vs. Adenocarcinoma) | -0.053 | -0.064 | -0.022 | 0      | 0      | -0.076 |
|                | d (Others vs. Adenocarcinoma)                  | -0.336 | -0.132 | -0.060 | 0.130  | 0.097  | NA     |
| Tumor size     | < 5cm                                          | 81.3   | 82.7   | 84.8   | 87.5   | 89.7   | 90.8   |
|                | ≥5cm                                           | 73.5   | 78.3   | 83.1   | 86.0   | 88.8   | 90.4   |
|                | d (≥5cm vs. < 5cm)                             | -0.189 | -0.112 | -0.047 | -0.044 | -0.029 | -0.014 |
| Marital status | Married                                        | 79.5   | 82.0   | 84.5   | 87.0   | 89.7   | 91.6   |
|                | Single                                         | 75.3   | 77.4   | 80.9   | 84.7   | 88.3   | 90.2   |
|                | Widowed                                        | 76.8   | 79.8   | 84.1   | 87.2   | 89.2   | 90.0   |
|                | Separated/Divorced                             | 76.9   | 82.2   | 85.6   | 87.5   | 87.7   | 86.7   |
|                | d (Single vs. Married)                         | -0.101 | -0.117 | -0.099 | -0.068 | -0.045 | -0.014 |
|                | d (Widowed vs. Married)                        | -0.065 | -0.056 | -0.011 | 0.006  | -0.016 | -0.028 |
|                | d (Separated/Divorced vs. Married)             | -0.063 | 0.005  | 0.030  | 0.015  | -0.065 | -0.143 |
| CEA            | Negative/Normal                                | 83.8   | 85.4   | 87.6   | 89.5   | 91.1   | 92.0   |
|                | Positive/Elevated                              | 68.1   | 72.6   | 77.5   | 81.7   | 85.4   | 87.4   |
|                | d (Positive/Elevated vs. Negative/Normal)      | -0.380 | -0.326 | -0.277 | -0.231 | -0.184 | -0.160 |
| T stage        | T1                                             | 94.2   | 95.0   | 94.7   | 94.4   | 94.4   | 94.4   |
|                | T2                                             | 92.7   | 93.4   | 93.5   | 93.6   | 93.9   | 93.8   |
|                | T3                                             | 78     | 79.9   | 83.1   | 85.9   | 88.3   | 89.8   |
|                | T4                                             | 50.8   | 58.2   | 65.7   | 72.7   | 80.5   | 84.8   |
|                | d (T2 vs. T1)                                  | -0.036 | -0.041 | -0.033 | -0.024 | -0.016 | -0.021 |
|                | d (T3 vs. T1)                                  | -0.392 | -0.384 | -0.318 | -0.252 | -0.197 | -0.160 |
|                | d (T4 vs. T1)                                  | -1.049 | -0.936 | -0.795 | -0.643 | -0.450 | -0.334 |
| N stage        | N0                                             | 88.1   | 89.2   | 90.2   | 91.0   | 92.1   | 92.4   |
|                | N1                                             | 67.9   | 70.8   | 75.6   | 80.7   | 84.5   | 86.9   |
|                | N2                                             | 46.2   | 53.2   | 62.3   | 70.0   | 78.3   | 85.2   |
|                | d (N1 vs. N0)                                  | -0.488 | -0.468 | -0.400 | -0.305 | -0.246 | -0.191 |
|                | d (N2 vs. N0)                                  | -1.013 | -0.916 | -0.765 | -0.622 | -0.446 | -0.250 |



|              |                          |        |        |        |        |        |        |
|--------------|--------------------------|--------|--------|--------|--------|--------|--------|
| Radiation    | None/Unknown             | 78.2   | 81.1   | 84.3   | 87.0   | 89.4   | 90.7   |
|              | Yes                      | 57.1   | 61.1   | 70.6   | 78.4   | 80.1   | NA     |
|              | d (Yes vs. None/Unknown) | -0.510 | -0.509 | -0.376 | -0.255 | -0.301 | NA     |
| Chemotherapy | None/Unknown             | 80.5   | 83.8   | 86.7   | 89.0   | 91.0   | 91.6   |
|              | Yes                      | 70.2   | 71.8   | 75.9   | 80.2   | 83.9   | 87.5   |
|              | d (Yes vs. None/Unknown) | -0.249 | -0.305 | -0.296 | -0.261 | -0.230 | -0.143 |

---

7  
8  
9  
10

Table 4. Multivariate analyses of overall deaths in baseline,  $\geq$  one-, three-, five-year survivors in the training cohort.

| Variables         |                         | Baseline survivors |        | > 1 year survivors |        | > 3 year survivors |        | > 5 year survivors |        |
|-------------------|-------------------------|--------------------|--------|--------------------|--------|--------------------|--------|--------------------|--------|
|                   |                         | HR                 | p      | HR                 | p      | HR                 | p      | HR                 | p      |
| Age               |                         | 1.07 (1.06-1.08)   | <0.001 | 1.08 (1.07-1.08)   | <0.001 | 1.09 (1.08-1.10)   | <0.001 | 1.10 (1.09-1.12)   | <0.001 |
| Race              | White                   | Ref                |        | Ref                |        | Ref                |        |                    |        |
|                   | Black                   | 1.20 (1.04-1.38)   | 0.010  | 1.10 (0.95-1.28)   | 0.217  | 1.06 (0.87-1.29)   | 0.579  | 1.14 (0.90-1.44)   | 0.287  |
|                   | Others                  | 1.20 (1.04-1.38)   | <0.001 | 0.77 (0.69-0.85)   | <0.001 | 0.77 (0.67-0.87)   | <0.001 | 0.69 (0.62-0.77)   | <0.001 |
| Sex               | Male                    | Ref                |        | Ref                |        | Ref                |        |                    |        |
|                   | Female                  | 0.73 (0.68-0.78)   | <0.001 | 0.71 (0.66-0.77)   | <0.001 | 0.67 (0.61-0.74)   | <0.001 | 0.69 (0.62-0.77)   | <0.001 |
| Year of diagnosis | < 2010                  |                    |        |                    |        |                    |        |                    |        |
|                   | $\geq$ 2010             | 0.90 (0.84-0.98)   | 0.004  |                    |        |                    |        |                    |        |
| Site              | Poximal                 | Ref                |        |                    |        |                    |        |                    |        |
|                   | Distal                  | 1.04 (0.97-1.12)   | 0.346  |                    |        |                    |        |                    |        |
|                   | Others                  | 1.52 (1.16-2.00)   | 0.003  |                    |        |                    |        |                    |        |
| Grade             | Grade I                 | Ref                |        | Ref                |        |                    |        |                    |        |
|                   | Grade II                | 1.04 (0.91-1.19)   | 0.537  | 0.96 (0.83-1.10)   | 0.524  |                    |        |                    |        |
|                   | Grade III               | 1.17 (1.01-1.35)   | 0.035  | 0.97 (0.83-1.13)   | 0.672  |                    |        |                    |        |
|                   | Grade IV                | 1.21 (0.98-1.50)   | 0.074  | 0.97 (0.76-1.24)   | 0.672  |                    |        |                    |        |
| Histology type    | Adenocarcinoma          | Ref                |        | Ref                |        | Ref                |        | Ref                |        |
|                   | Mucinous adenocarcinoma | 1.04 (0.93-1.16)   | 0.462  | 1.04 (0.92-1.18)   | 0.494  | 1.06 (0.92-1.23)   | 0.393  | 1.09 (0.92-1.30)   | 0.311  |
|                   | Others                  | 0.81 (0.64-1.01)   | 0.064  | 0.90 (0.68-1.18)   | 0.452  | 0.65 (0.45-0.95)   | 0.025  | 0.80 (0.52-1.22)   | 0.297  |
| Tumor size        | < 5cm                   | Ref                |        | Ref                |        |                    |        | Ref                |        |
|                   | $\geq$ 5cm              | 1.01 (0.94-1.08)   | 0.794  | 0.96 (0.89-1.04)   | 0.324  |                    |        | 1.03 (0.92-1.14)   | 0.608  |
| Marital status    | Married                 | Ref                |        | Ref                |        | Ref                |        | Ref                |        |
|                   | Single                  | 1.09 (0.97-1.23)   | 0.152  | 1.12 (0.98-1.28)   | 0.089  | 1.21 (1.03-1.41)   | 0.02   | 1.02 (0.83-1.24)   | 0.874  |
|                   | Widowed                 | 1.14 (1.05-1.23)   | 0.001  | 1.15 (1.05-1.25)   | 0.002  | 1.24 (1.12-1.37)   | <0.001 | 1.22 (1.08-1.38)   | 0.002  |
|                   | Separated/Divorced      | 1.45 (1.29-1.64)   | <0.001 | 1.36 (1.19-1.56)   | <0.001 | 1.47 (1.25-1.73)   | <0.001 | 1.57 (1.29-1.92)   | <0.001 |
| CEA               | Negative/Normal         | Ref                |        |                    |        | Ref                |        |                    |        |
|                   | Positive/Elevated       | 1.38 (1.29-1.47)   | <0.001 | 1.35 (1.25-1.45)   | <0.001 | 1.39 (1.26-1.50)   | <0.001 | 1.26 (1.13-1.40)   | <0.001 |

|              |              |                  |        |                  |        |                   |        |                  |       |
|--------------|--------------|------------------|--------|------------------|--------|-------------------|--------|------------------|-------|
| T stage      | T1           | Ref              |        | Ref              |        | Ref               |        | Ref              |       |
|              | T2           | 1.03 (0.88-1.20) | 0.746  | 0.99 (0.84-1.16) | 0.880  | 1.08 (0.90-1.29 ) | 0.419  | 1.06 (0.86-1.31) | 0.586 |
|              | T3           | 1.21 (1.05-1.39) | 0.009  | 1.19 (1.03-1.38) | 0.022  | 1.12 (0.95-1.32)  | 0.161  | 1.07 (0.88-1.30) | 0.519 |
|              | T4           | 2.02 (1.72-2.38) | <0.001 | 1.84 (1.54-2.18) | <0.001 | 1.42 (1.16-1.73)  | <0.001 | 1.31 (1.02-1.70) | 0.037 |
| N stage      | N0           | Ref              |        | Ref              |        | Ref               |        |                  |       |
|              | N1           | 1.47 (1.35-1.59) | <0.001 | 1.51 (1.38-1.66) | <0.001 | 1.26 (1.13-1.41)  | <0.001 |                  |       |
|              | N2           | 2.30 (2.06-2.56) | <0.001 | 2.27 (2.00-2.57) | <0.001 | 1.64 (1.40-1.93)  | <0.001 |                  |       |
| Chemotherapy | None/Unknown | Ref              |        | Ref              |        | Ref               |        | Ref              |       |
|              | Yes          | 0.65 (0.59-0.71) | <0.001 | 0.65 (0.59-0.73) | <0.001 | 0.79 (0.70-0.90)  | <0.001 | 0.83 (0.72-0.96) | 0.009 |

12 HR Hazard ratio

13

14

Table 5. Multivariate analyses of colon-specific deaths in baseline,  $\geq$  one-, three-, five-year survivors in the training cohort.

| Variables         | Baseline survivors |        | > 1 year survivors |        | > 3 year survivors |                  | > 5 year survivors |                  |        |
|-------------------|--------------------|--------|--------------------|--------|--------------------|------------------|--------------------|------------------|--------|
|                   | HR                 | p      | HR                 | p      | HR                 | p                | HR                 | p                |        |
| Age               | 1.03 (1.02-1.04)   | <0.001 | 1.04 (1.03-1.05)   | <0.001 | 1.04 (1.02-1.05)   | <0.001           | 1.06 (1.03-1.08)   | <0.001           |        |
| Race              | White              |        | Ref                |        | Ref                |                  |                    |                  |        |
|                   | Black              |        | 1.26 (1.00-1.60)   | 0.052  | 1.32 (0.95-1.84)   | 0.095            |                    |                  |        |
|                   | Others             |        | 0.88 (0.75-1.05)   | 0.148  | 0.93 (0.73-1.18 )  | 0.552            |                    |                  |        |
| Sex               | Male               |        |                    |        | Ref                |                  |                    |                  |        |
|                   | Female             |        |                    |        | 0.70 (0.59-0.84)   | <0.001           |                    |                  |        |
| Year of diagnosis | < 2010             |        | Ref                |        |                    |                  |                    |                  |        |
|                   | $\geq$ 2010        |        | 0.84 (0.76-0.93)   | 0.001  |                    |                  |                    |                  |        |
| Site              | Poximal            |        | Ref                |        | Ref                |                  | Ref                |                  |        |
|                   | Distal             |        | 1.09 (0.97-1.23)   | 0.149  |                    | 1.43 (1.20-1.71) | <0.001             | 1.71 (1.34-2.20) | <0.001 |
|                   | Others             |        | 1.79 (1.26-2.56)   | 0.001  |                    | 0.83 (0.37-1.86) | 0.649              | 1.32 (0.42-4.17) | 0.632  |
| Grade             | Grade I            |        | Ref                |        | Ref                |                  |                    |                  |        |
|                   | Grade II           |        | 1.15 (0.90-1.47)   | 0.266  | 1.00 (0.77-1.30)   | 0.981            |                    |                  |        |
|                   | Grade III          |        | 1.36 (1.05-1.77)   | 0.020  | 0.97 (0.73-1.28)   | 0.816            |                    |                  |        |
|                   | Grade IV           |        | 1.32 (0.94-1.85)   | 0.109  | 0.81 (0.54-1.21)   | 0.300            |                    |                  |        |

|                |                         |                  |        |                  |        |                   |        |                  |       |
|----------------|-------------------------|------------------|--------|------------------|--------|-------------------|--------|------------------|-------|
| Histology type | Adenocarcinoma          |                  |        |                  |        |                   |        |                  |       |
|                | Mucinous adenocarcinoma | 0.96 (0.80-1.15) | 0.648  |                  |        |                   |        |                  |       |
|                | Others                  | 0.94 (0.70-1.28) | 0.710  |                  |        |                   |        |                  |       |
| Tumor size     | < 5cm                   | Ref              |        | Ref              |        |                   |        |                  |       |
|                | ≥5cm                    | 0.96 (0.87-1.07) | 0.499  | 0.90 (0.80-1.02) | 0.096  |                   |        |                  |       |
| Marital status | Married                 | Ref              |        | Ref              |        | Ref               |        |                  |       |
|                | Single                  | 1.10 (0.92-1.32) | 0.282  | 1.25 (1.02-1.52) | 0.029  | 1.41 (1.07-1.86)  | 0.014  |                  |       |
|                | Widowed                 | 0.99 (0.88-1.11) | 0.842  | 0.98 (0.86-1.13) | 0.799  | 1.15 (0.93-1.41)  | 0.195  |                  |       |
|                | Separated/Divorced      | 1.32 (1.10-1.59) | 0.002  | 1.02 (0.81-1.28) | 0.888  | 1.29 (0.95-1.76)  | 0.108  |                  |       |
| CEA            | Negative/Normal         | Ref              |        | Ref              |        | Ref               |        | Ref              |       |
|                | Positive/Elevated       | 1.55 (1.40-1.72) | <0.001 | 1.48 (1.32-1.67) | <0.001 | 1.71 (1.45-2.01)  | <0.001 | 1.41 (1.11-1.81) | 0.006 |
| T stage        | T1                      | Ref              |        | Ref              |        | Ref               |        | Ref              |       |
|                | T2                      | 0.98 (0.69-1.40) | 0.903  | 1.04 (0.70-1.55) | 0.844  | 1.31 (0.78-2.20)  | 0.299  | 1.41 (0.75-2.65) | 0.281 |
|                | T3                      | 1.98 (1.45-2.70) | <0.001 | 2.18 (1.54-3.09) | <0.001 | 2.35 (1.49-3.71)  | <0.001 | 1.88 (1.06-3.32) | 0.030 |
|                | T4                      | 4.27 (3.09-5.91) | <0.001 | 4.34 (3.01-6.26) | <0.001 | 3.97 (2.44-6.47)  | <0.001 | 2.77 (1.45-5.28) | 0.002 |
| N stage        | N0                      | Ref              |        | Ref              |        | Ref               |        |                  |       |
|                | N1                      | 2.36 (2.08-2.68) | <0.001 | 2.60 (2.23-3.02) | <0.001 | 1.82 (1.48-2.25 ) | <0.001 | 1.36 (0.99-1.87) | 0.056 |
|                | N2                      | 4.45 (3.84-5.16) | <0.001 | 4.89 (4.11-5.83) | <0.001 | 2.94 (2.28-3.79)  | <0.001 | 1.39 (0.89-2.18) | 0.148 |
| Radiation      | None/Unknown            |                  |        | Ref              |        |                   |        |                  |       |
|                | Yes                     |                  |        | 1.52 (0.95-2.43) | 0.078  |                   |        |                  |       |
| Chemotherapy   | None/Unknown            | Ref              |        | Ref              |        | Ref               |        | Ref              |       |
|                | Yes                     | 0.70 (0.62-0.80) | <0.001 | 0.74 (0.63-0.86) | <0.001 | 0.94 (0.76-1.17)  | 0.596  | 1.12 (0.80-1.58) | 0.498 |

15 HR Hazard ratio

16

17

18

19

20



A

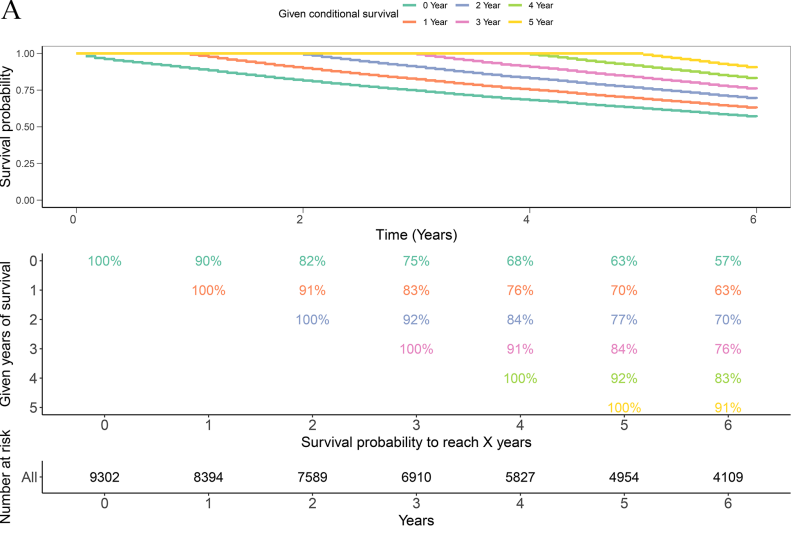

B

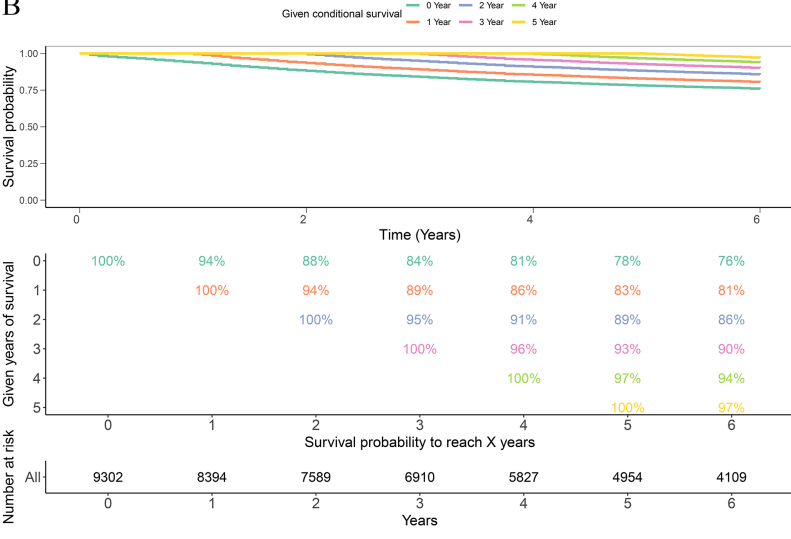

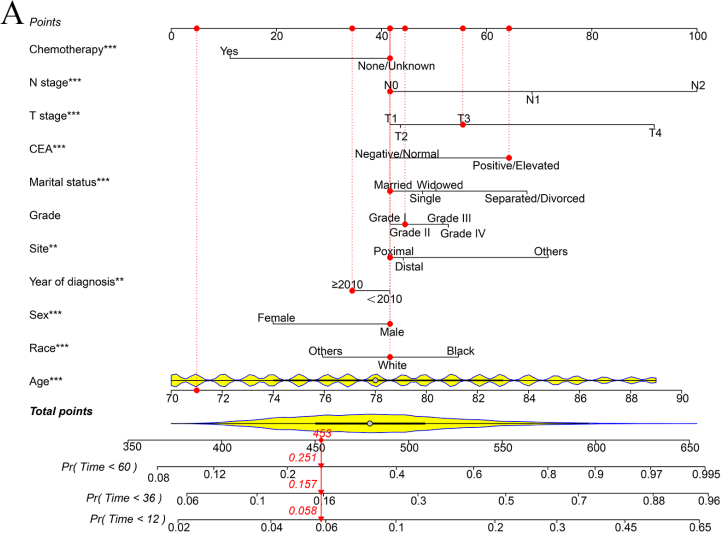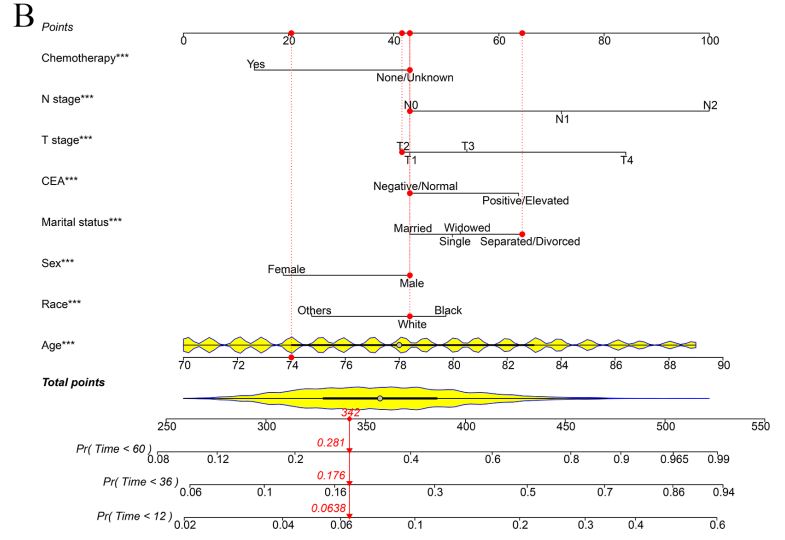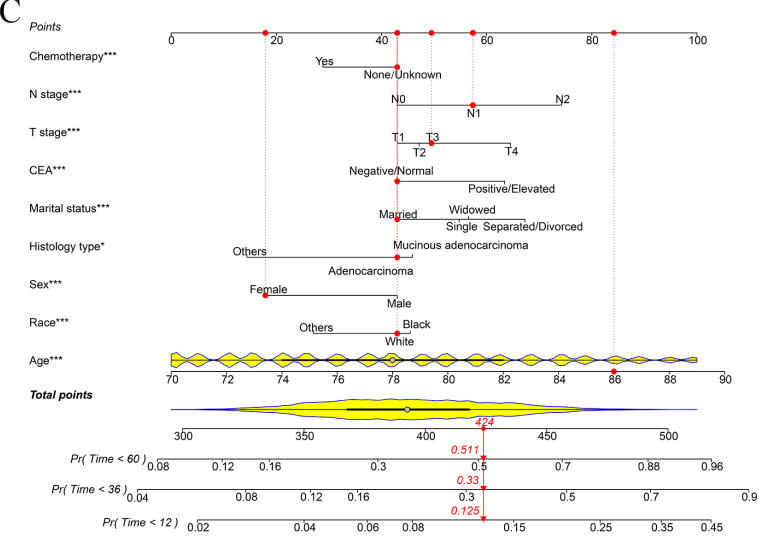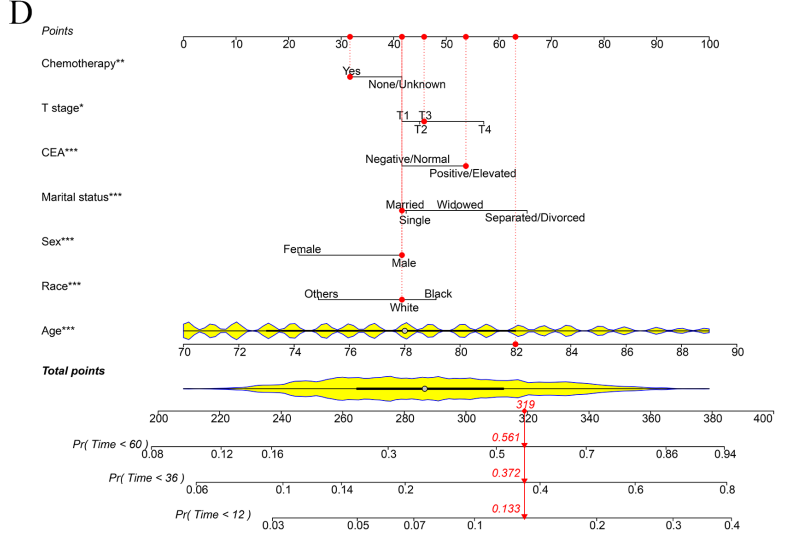

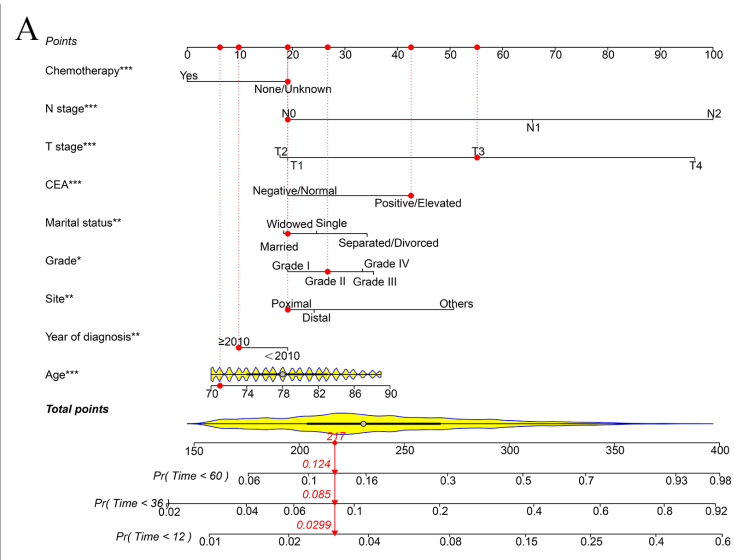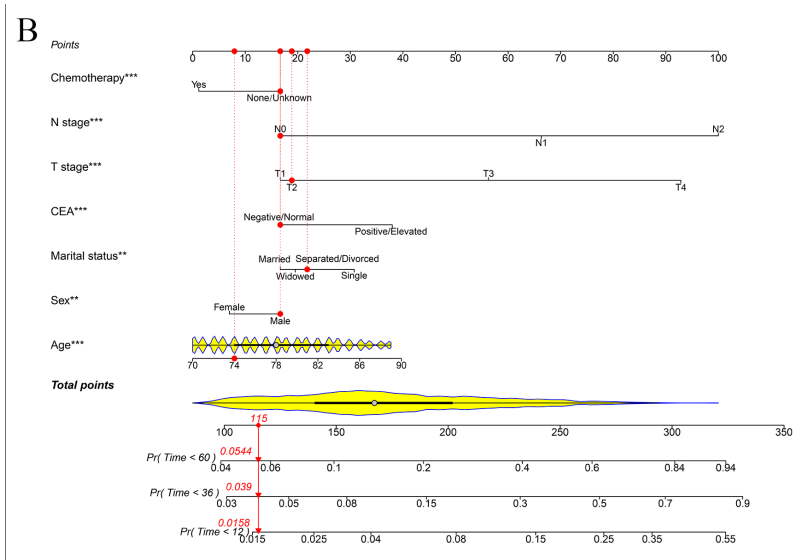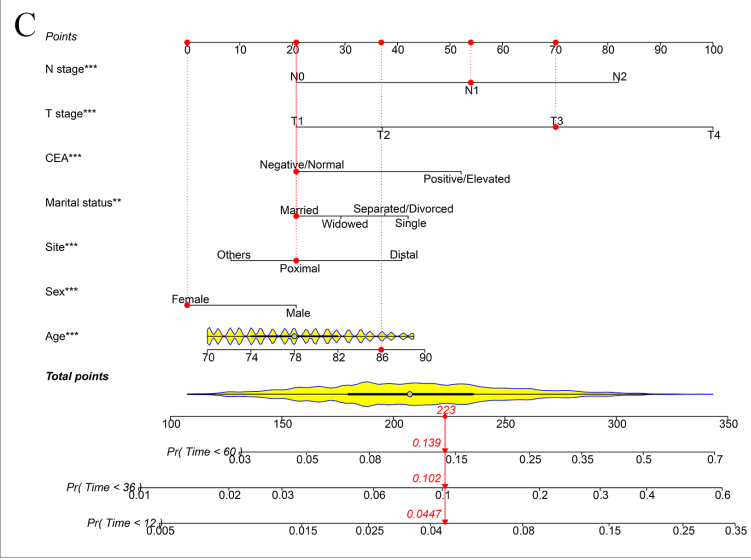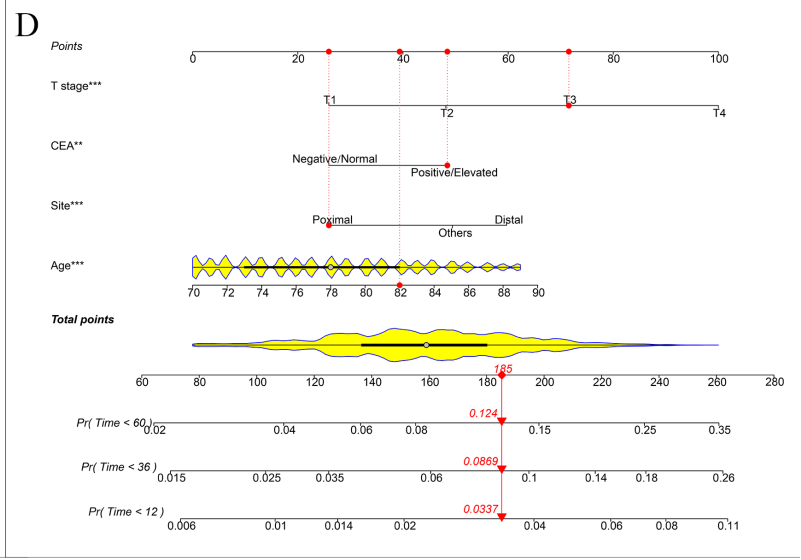



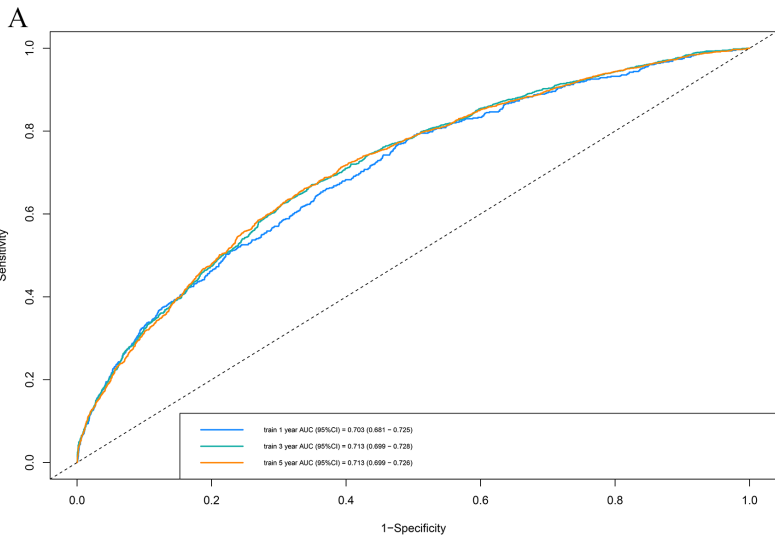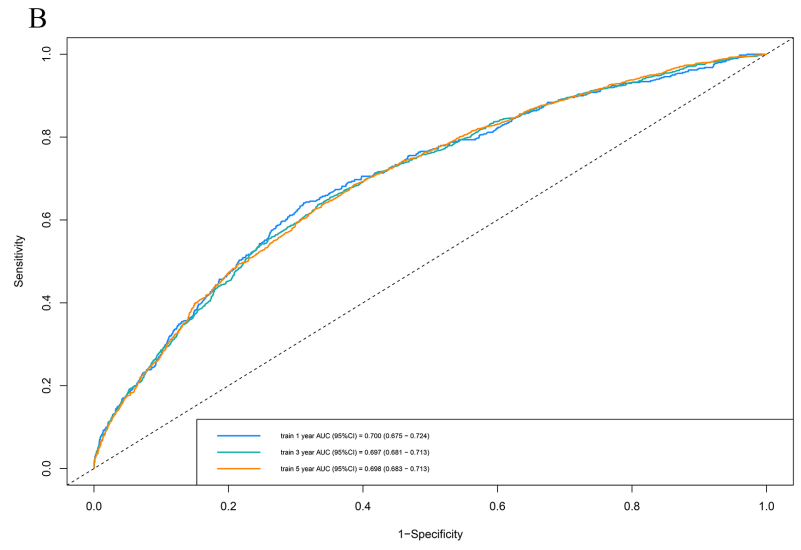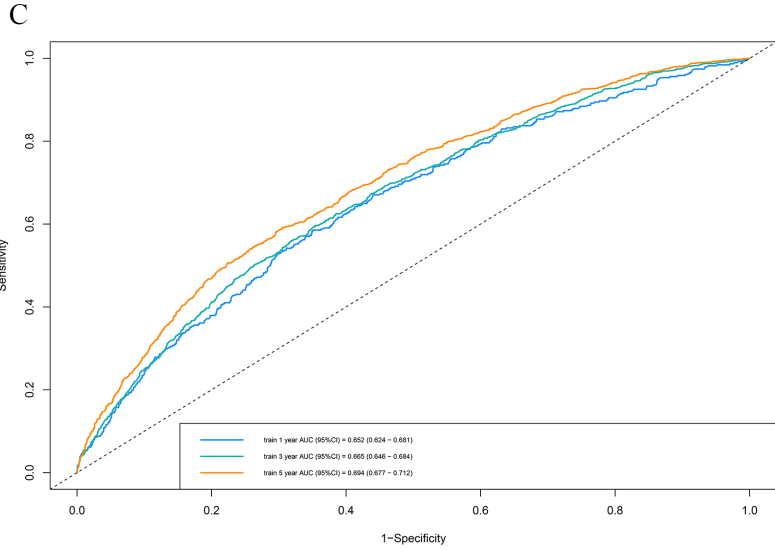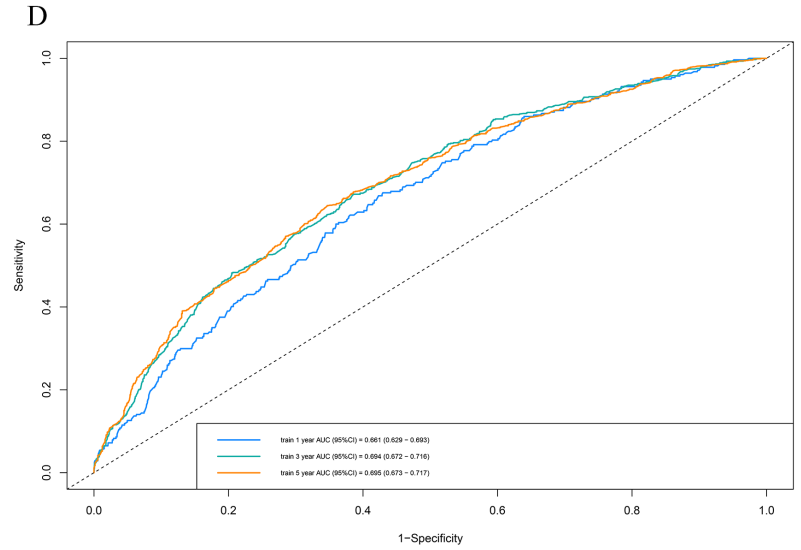

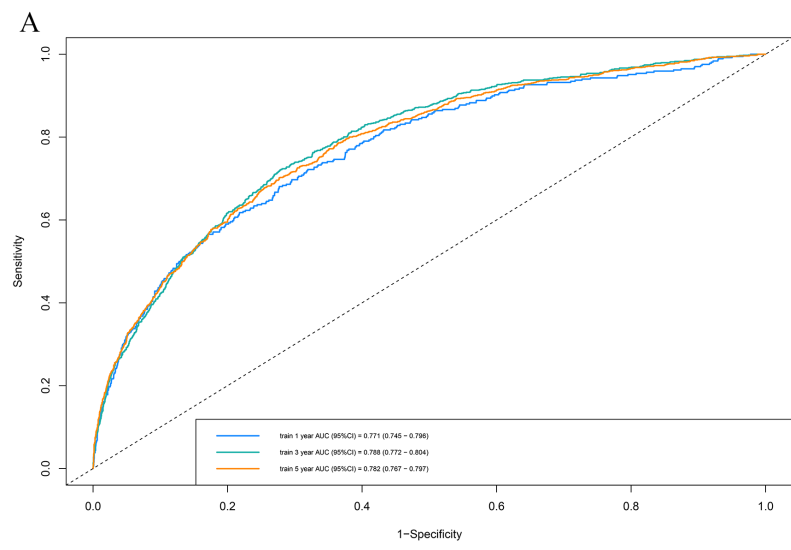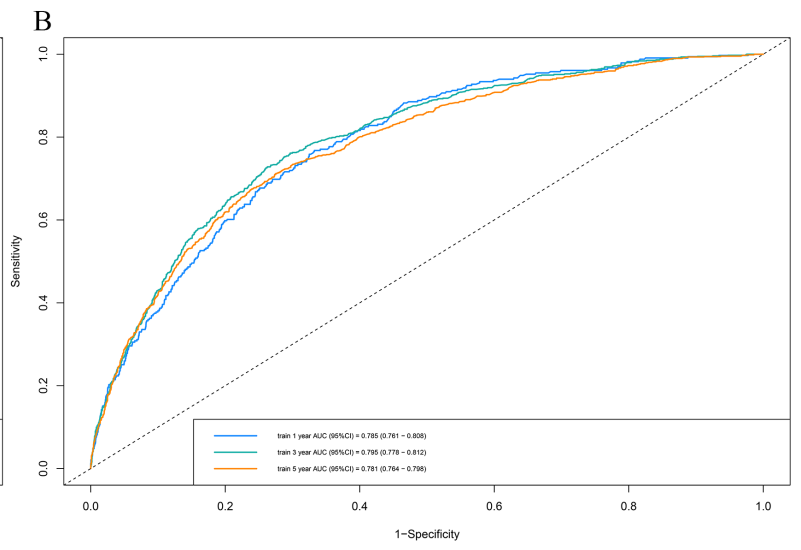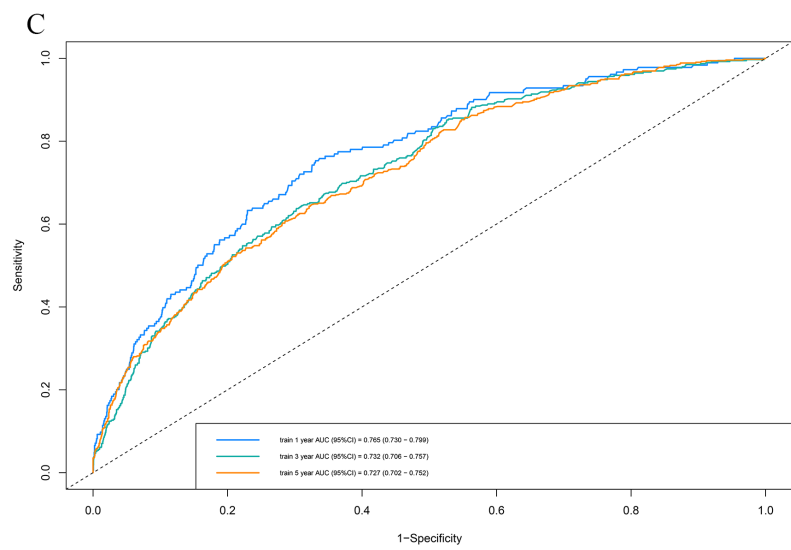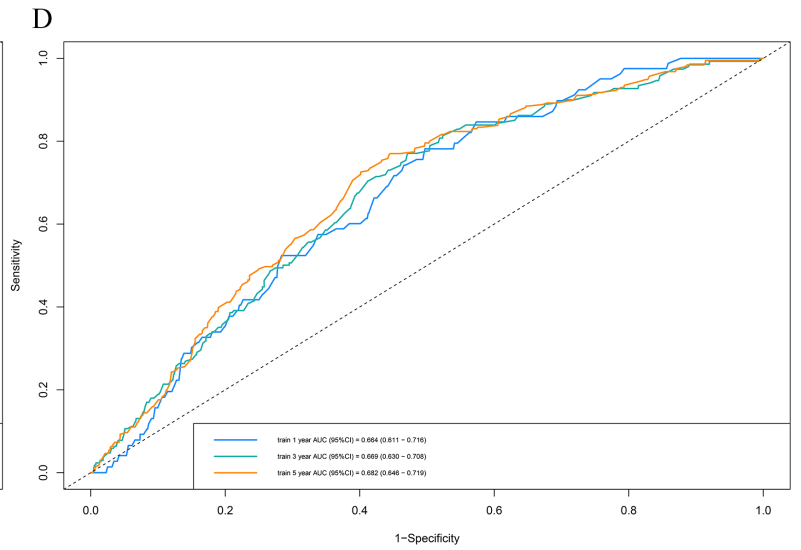

Source: https://medrxiv.org/content/10.1101/2024.04.09.24305543v1.full.pdf
